# Supplementary material for: Respiratory biofeedback and psycho-education for patients with post COVID- 19 symptoms and bodily distress: study protocol of the randomized, controlled explorative intervention trial POSITIV
Source: Springer Nature journal article supplement (doi:10.1186/s13063-025-08842-6), 2025-04-25
Supplement: MOESM1 [file 13063_2025_8842_MOESM1_ESM.pdf]

|                       | Study Period |            |                 |    |    |    |
|-----------------------|--------------|------------|-----------------|----|----|----|
|                       | Enrollment   | Allocation | Post-allocation |    |    |    |
| TIMEPOINT             | -t1          | t0         | t1              | t2 | t3 | t4 |
| <b>ENROLLMENT:</b>    |              |            |                 |    |    |    |
| Eligibility screen    | x            |            |                 |    |    |    |
| Informed consent      | x            |            |                 |    |    |    |
| Allocation            |              | x          |                 |    |    |    |
| <b>INTERVENTIONS:</b> |              |            |                 |    |    |    |
| Intervention group    |              | x          | ←————→          |    |    |    |
| Control group         |              | x          | ←————→          |    |    |    |
| <b>ASSESSMENTS:</b>   |              |            |                 |    |    |    |
| baseline variables    | x            | x          |                 |    |    |    |
| outcome variables     |              | x          | x               | x  | x  | x  |
